1 Hyperlocal Variation in Soil Iron and Rhizosphere Microbiome Determines Disease

2 Development in Amenity Turfgrass

3

4 Ming-Yi Chou#, Smita Shrestha, Renee Rioux, Paul Koch

5

6 Department of Plant Pathology, University of Wisconsin-Madison, Madison, Wisconsin, USA

7

8 Running Head: Soil Microbiome and Dollar Spot

9

10 #Address correspondence to Ming-Yi Chou, [mchou5@wisc.edu](mailto:mchou5@wisc.edu)

11

12 Main body of text: 4970 words

13

14 Abstract: 385 words

15

16 ABSTRACT

17 Dollar spot, caused by the fungal pathogen *Claviceps* spp., is an economically important  
18 disease of amenity turfgrass in temperate climates worldwide. This disease often occurs in a  
19 highly variable manner, even on a local scale with relatively uniform environmental conditions.  
20 The objective of this study was to investigate mechanisms behind this local variation, focusing  
21 on contributions of the soil and rhizosphere microbiome. Turfgrass, rhizosphere, and bulk soil  
22 samples were taken from within a 256 m<sup>2</sup> area of healthy turfgrass, transported to a controlled  
23 environment chamber, and inoculated with *C. jacksonii*. Bacterial communities were profiled  
24 targeting the 16s rRNA gene, and 16 different soil chemical properties were assessed. Despite  
25 their initial uniform appearance, the samples differentiated into highly susceptible and  
26 moderately susceptible groups following inoculation in the controlled environment chamber. The  
27 highly susceptible samples harbored a unique rhizosphere microbiome with lower relative  
28 abundance of antibiotic-producing bacterial taxa and higher predicted abundance of genes  
29 associated with xenobiotic biodegradation pathways. In addition, stepwise regression revealed  
30 that bulk soil iron content was the only significant soil characteristic that positively regressed  
31 with decreased dollar spot susceptibility during the peak disease development stage. These  
32 findings suggest that localized variation in soil iron induces the plant to select for a particular  
33 rhizosphere microbiome that alters the disease outcome. More broadly, further research in this  
34 area may indicate how plot-scale variability in soil properties can drive variable plant disease  
35 development through alterations in the rhizosphere microbiome.

36

37 IMPORTANCE

38 Dollar spot is the most economically important disease of amenity turfgrass, and more fungicides  
39 are applied targeting dollar spot than any other turfgrass disease. Dollar spot symptoms are small  
40 (3-5 cm), circular patches that develop in a highly variable manner within plot-scale even under  
41 seemingly uniform conditions. The mechanism behind this variable development is unknown.  
42 This study observed that differences in dollar spot development over a 256 m<sup>2</sup> area were  
43 associated with differences in bulk soil iron concentration and correlated with a particular  
44 rhizosphere microbiome. These findings provide important clues for understanding the  
45 mechanisms behind the highly variable development of dollar spot, which may offer important  
46 clues for innovative control strategies. Additionally, these results also suggest that small changes  
47 in soil properties can alter plant activity and hence the plant-associated microbial community  
48 which has important implications for a broad array of important agricultural and horticultural  
49 plant pathosystems.

50

## 51 INTRODUCTION

52 Dollar spot on cool-season turfgrasses in North America is caused by the fungus *Clariireedia*  
53 *jacksonii* and is the most economically important disease of amenity turfgrass in temperate  
54 climates around the world (1). It causes roughly circular patches of bleached turfgrass 3 to 5 cm  
55 in diameter that can blight the stand and reduce the functionality of the site for recreational  
56 purposes (2). The primary host of dollar spot is creeping bentgrass (*Agrostis stolonifera*), and a  
57 lack of host resistance or effective cultural control strategies has made dollar spot the target of  
58 more fungicide applications than any other turfgrass disease (3). Heavy reliance on synthetic  
59 fungicides has led to the development of fungicide resistant fungal populations (4), imposes a  
60 significant financial burden on the turfgrass manager (5), and increases the risk of human and

61 environmental contamination resulting from repeated chemical exposures (6). The development  
62 of dollar spot symptoms is often highly variable within several meters distance, even in  
63 uniformly managed turfgrass with nearly identical environmental conditions (7). While it is not  
64 known why dollar spot symptoms develop in such a variable manner, one plausible explanation  
65 is a link to hyperlocal variations in microbial antagonists or variations in soil physical, chemical,  
66 or biological properties.

67 Spatial variation in plant disease is often observed in both managed and natural plant systems,  
68 and most studies on variation in plant disease incidence and severity have been conducted in  
69 large-scale agricultural fields over tens or hundreds of hectares. A. Adiobo et al. (8) observed  
70 that the physicochemical and microbial properties of andosols suppressed *Pythium myriotylum*  
71 root rot in cocoyam (*Xanthosoma sagittifolium*) more effectively than ferralsols. Varied  
72 susceptibility to disease in adjacent fields with similar soil physicochemical characteristics has  
73 commonly been attributed to disease suppressive or disease conducive soils and is often  
74 influenced by cropping history (9, 10). Though on a larger scale than the variation observed in  
75 dollar spot, the pathogen suppression function of a specific suppressive soil has provided some  
76 clues as to how the same soil type could have dramatically different pathogen suppression  
77 functions. Enrichment of the antagonistic microbial population in the rhizosphere often serves as  
78 the key plant pathogen suppression mechanism in previously characterized disease suppressive  
79 soils (11). As a classic example, enriched antibiotic 2,4-diacetylphloroglucinol-producing  
80 fluorescent *Pseudomonas* species led to a reduction in take-all disease when found in the  
81 rhizosphere of wheat and flax (12).

82 The rhizosphere microbiome and its functions are co-determined by both the plant and the soil.  
83 The host plant produces root exudates that recruit particular microbes from within the soil (11).

84 The soil harbors varied microbial communities shaped by soil type and associated properties,  
85 such as structure and pH (13). Therefore, the rhizosphere microbiome and its microbial disease  
86 suppressive function can shift following changes in the soil environment. H. Peng et al. (14)  
87 varied the chemical and physical properties of *Fusarium oxysporum* f. sp. *cubense* suppressive  
88 and conducive soils and showed that soil physicochemical traits can mediate suppressiveness of  
89 both suppressive and conducive soils against the pathogen's chlamydospores. This suggests that  
90 soil physicochemical and microbial properties can cooperatively affect plant disease suppression  
91 in agricultural fields.

92 Soil spatial variation in microbial properties is often studied at multiple levels, including micro,  
93 plot, field, landscape and regional scales (15, 16). Over a small plot-scale, spatial variation of  
94 smut disease (*Ustilago syntherismae*) on crabgrass (*Digitaria sanguinalis*) was influenced by  
95 both pathogen spore density and spatial location (17). However, soil property influences were  
96 not investigated in this study and spores or other long-distance dispersal mechanisms have never  
97 been associated with dollar spot in a field environment (2). High spatial variations in soil  
98 physicochemical and microbial properties were observed in a managed grassland, including a  
99 wide range of soil pH, nitrogen content, microbial biomass, and microbial catabolism profiles  
100 within the scales of several centimeters to meters (18), but the impact of these variations on  
101 plant-pathogen interactions remained unclear. Recently, Z. Wei et al. (19) examined disease  
102 variation in tomato (*Solanum lycopersicum*) and observed that the rhizosphere soil bacterial  
103 community effectively predicted the severity of the soil-borne bacterial disease *Ralstonia*  
104 *solanacearum*. Similarly, S. Chen et al. (20) observed differences in rhizosphere bacterial  
105 community structure, diversity, acid phosphatase activity, root iron content, and bulk soil  
106 calcium and magnesium between healthy and unhealthy blueberry plants (*Vaccinium*

107 *corymbosum*). These results again indicate the importance of both soil chemical properties and  
108 the rhizosphere microbiome on plant health over a field-scale or smaller. However, it remains  
109 unknown whether the rhizosphere and/or bulk soil microbiome impacts the disease severity of a  
110 foliar fungal pathogen when interacting with specific soil chemical properties.

111 In this study, various factors contributing to the localized variation in dollar spot development on  
112 monocultured turfgrass was studied. Rhizosphere and bulk soil microbiomes as well as soil  
113 chemical properties were examined to determine possible causes for the highly variable spatial  
114 nature of dollar spot development. We hypothesized that soil chemical properties and the  
115 rhizosphere microbiome are both significant variables in determining dollar spot disease  
116 susceptibility in a uniformly managed and monocultured turfgrass system. Turfgrass is an  
117 excellent system to study this phenomenon because the high plant density allows for robust  
118 sampling over a small scale. The initial 132 cm<sup>2</sup> surface area turfgrass soil plug harbored an  
119 estimated 1,200 individual creeping bentgrass plants, and each sub-sample derived from the soil  
120 core contained 10 to 15 individual plants. By understanding the factors that drive variation in  
121 dollar spot disease development within a plot-scale in a high-density monoculture system, we  
122 may discover mechanisms that can be targeted for improved biological management of a number  
123 of important plant pathogens.

124

## 125 RESULTS

126 **Dollar spot development.** Dollar spot development was measured as decrease of greenness over  
127 time in order to standardize the quantification of disease symptoms as lesion shape and color can  
128 be difficult to determine with simple visual assessments. The resulting greenness decay curve

129 followed a sigmoidal decay pattern ( $r=0.9286$  and  $p\text{-value}<0.0001$ ) (Fig.1). Disease symptoms  
130 initially developed within two days after inoculation (DAI), then increased rapidly over the next  
131 four to twelve DAI, before slowing during the saturation phase on 14 to 16 DAI. Substantial  
132 differences in symptom severity between samples started showing up on four DAI and  
133 differences remained apparent throughout the incubation.

134 **Attributing soil bacterial community difference as a function of disease variability.** Turf  
135 samples were grouped into high, medium, and low disease according to the disease severity of  
136 each DAI. The bacterial microbiome from rhizosphere and bulk soil associated with each sample,  
137 which had been separated prior to inoculation, was then assessed to see if the microbiome  
138 structure explained turfgrass responses to *C. jacksonii* inoculation. The rhizosphere bacterial  
139 community differed between high and low disease severity groups when categorized based on  
140 severity between 4 and 10 DAI according to permutational analysis of variance (PERMANOVA)  
141 (Table 1). There were no differences in bacterial community structure found between high and  
142 low disease severity groups when categorized according to initial disease development (DAI 0-2)  
143 or the disease saturation phase (DAI 12-16). In addition, no differences in the bulk soil bacterial  
144 community were found among the disease severity groups throughout the entire incubation  
145 (Table 1). The period that the rhizosphere soil microbiome showed differences in structure  
146 between the high and low disease groups (4-10 DAI) matched the backslope of the disease  
147 development curve (Fig. 1), which suggested that the initial soil rhizosphere microbiome can  
148 affect the peak dollar spot development. The samples were then re-categorized according to their  
149 disease status during the peak disease development stage (4-10 DAI) to make the peak disease  
150 development period as the target of prediction instead of any single day within this period. The  
151 samples initially categorized as high disease during the 4 to 10 DAI period never shifted into the

152 low severity group and vice versa, so the 18 samples naturally broke into two groups except for  
153 one sample that stayed in the medium disease group throughout the study and was excluded from  
154 further analysis. Further analyses were performed based on breaking the samples into nine highly  
155 susceptible (HS) samples and eight moderately susceptible (MS) samples.

156 **Comparison of rhizosphere bacterial communities of highly susceptible and moderately**

157 **susceptible turfgrass.** Two-dimensional principal coordinate analysis showed that distinct  
158 bacterial community structures existed between the bulk and rhizosphere soil and between the  
159 rhizosphere soil of HS and MS samples (Fig. 2). PERMANOVA statistically confirmed the  
160 visual observations of bacterial community composition differences between sample types (Fig.  
161 2a) and susceptibility groups of rhizosphere soil (Fig. 2b). Although the overall rhizosphere  
162 bacterial compositions are different between MS and HS turfgrass, the major microbial taxa are  
163 identical when analyzed at family and genus levels with less than 20% and more than 75% of the  
164 taxa unidentified at each taxonomic level, respectively (Fig. 3). The dominant families identified  
165 included *Gemmataceae*, *Pirellulaceae*, *Chitinophagaceae*, *Pedospheraceae*, and  
166 *Burkholderiaceae* (Fig. 3a) and the dominant genus' identified included *Flavobacterium*,  
167 *Haliangium*, *Chthoniobacter*, *Pirellula*, and *Gaiella* (Fig. 3b). The majority of the rhizosphere  
168 soil amplicon sequence variants (ASVs) are shared between the HS and MS turfgrass (8077)  
169 with more ASVs being unique to HS (1181) than MS (347) (Fig. 4). Highly susceptible turfgrass  
170 samples also had a higher species richness and  $\beta$ -diversity as shown using the Shannon index  
171 (Fig. 5).

172 In the rhizosphere, there were 28 families and 32 genera different in relative abundance between  
173 HS and MS samples according to Welch's t-test (Fig. 6a). A balance analysis that accounted for  
174 the compositional nature of the dataset was also performed to detect the microbial signature for



175 discerning the high and low disease rhizosphere bacterial community. The signatures were  
176 determined by searching the association between the factor for overall microbiome difference  
177 with the bacterial taxa balances defined as normalized log ratio of the geometric mean of the  
178 numerator and denominator bacterial taxa. The results showed that relative abundance log ratio  
179 of *Rhizobacter* (numerator) to *Microvirga* (denominator) at the genus level and *Solibacteraceae*  
180 subgroup3 (numerator) to *Saprospiraceae* (denominator) at the Family level were robust  
181 microbial signatures to differentiate the HS and MS turfgrass rhizosphere bacterial community  
182 with an adjusted area under the receiver operating characteristic curve for cross-validation equal  
183 to 0.9875 and 0.983 for genus and family level, respectively (Fig. 6b).

184 A co-occurrence network analysis was performed to visualize the microbial interaction of HS  
185 and MS turf rhizosphere soil bacteria and showed different network patterns (Fig. 7a). The co-  
186 occurrence networks were then further analyzed using “NetShift” to quantify the differences and  
187 identify the keystone microbial taxa that triggered the shift of the microbial networking between  
188 HS and MS rhizosphere bacterial communities when clustered at the Family and Genus level  
189 (Fig. 7b). There were 55 families and 28 genera identified as driver taxa when comparing HS and  
190 MS co-occurrence networks aggregated at each taxonomic level.

191 Rhizosphere soil bacterial function was predicted using Tax4Fun2 (21) to explore the potential  
192 microbial functional differences between HS and MS samples during the peak disease  
193 development period. Predicted functional pathways at level-two according to KEGG reference  
194 for molecular functions of genes (22) including nucleotide metabolism, folding, sorting and  
195 degradation, cell motility, translation, transcription, replication and repair, and metabolism of  
196 cofactors and vitamins associated genes were found to be more abundant in rhizosphere of MS

197 samples (Fig 8). In the HS samples rhizosphere genes associated with xenobiotic biodegradation  
198 and metabolism pathways associated genes were more abundant (Fig. 8).

199 **Bulk soil nutrient and chemical property analysis.** Bulk soil chemical properties were  
200 compared among the three disease severity groups categorized according to turf dollar spot  
201 severity throughout the incubation period. The bulk soil was sampled prior to the inoculation of  
202 *C. jacksonii* to evaluate if bulk soil chemical property explained the turfgrass responses to the  
203 pathogen inoculation. The results showed that iron concentration was significantly lower in the  
204 high disease than the low disease group throughout the peak disease development stage from 4 to  
205 10 DAI (Table 2), and iron was also lower in the HS samples relative to the MS samples  
206 ( $p=0.0021$ ) following re-categorization of the samples (Table S1 in the supplemental material). A  
207 Mantel test was conducted to determine correlation between the overall soil chemical properties  
208 and the soil bacterial community. Bulk soil chemical properties did not correlate with the bulk  
209 soil bacterial community ( $r=-0.2297$ ,  $p=0.966$ ) but they did correlate with the rhizosphere  
210 bacterial community ( $r= 0.274$ ,  $p=0.048$ ). To further examine the relationship between bulk soil  
211 chemical properties and dollar spot severity during the peak disease development stage, a  
212 backward stepwise regression model was constructed after removing significant colinear  
213 variables. The stepwise model (adjusted  $r^2=0.5041$ ,  $p=0.002031$ ) suggested that iron significantly  
214 ( $p=0.00062$ ) and positively regressed with average turfgrass greenness during the peak  
215 development period (Table 3).

216

217 DISCUSSION

218 The results from this study indicated that initial differences in the soil rhizosphere bacterial  
219 community can predict the level of dollar spot susceptibility in turfgrass plants. These  
220 differences occurred over small areas despite uniform host plants and seemingly uniform  
221 environmental conditions. The mechanisms of disease suppression provided by the rhizosphere  
222 community were not directly studied, but differential analysis of microbial taxa relative  
223 abundances, and NetShift analysis of co-occurrence networks in this study provided supporting  
224 information for the hypothesis that disease suppression is related to the occurrence of  
225 antagonistic organisms in the rhizosphere. A similar hypothesis was also suggested in work done  
226 by Z. Wei et al. (19), which indicated that the rhizosphere bacterial community determined  
227 occurrence and severity of *Ralstonia solanacearum* in tomato plants and specifically linked  
228 disease suppression to the antagonistic activity of soil bacteria in the genera *Bacillus* and  
229 *Pseudomonas*. In our study, differential analysis revealed that certain families and genera were  
230 higher in relative abundance in the rhizosphere of MS samples compared to HS samples. These  
231 families, including *Nocardiaceae* and *Xanthomonadaceae*, and genera, including *Rhodococcus*  
232 and *Janthinobacterium*, are known to produce a range of antimicrobial compounds (23-26).  
233 Among the microbial co-occurrence network shift drivers identified through “NetShift”, node  
234 betweenness was significantly increased in MS samples for certain genera, including  
235 *Pseudonocardia*, *Streptomyces*, and “*Candidatus Entotheonella*,” which are all known for their  
236 ability to produce antifungal compounds (27-29). While more research is needed, these findings  
237 provide possible explanations for microbial suppression of dollar spot in MS turf samples.

238 In addition to known antibiotic producers, other bacterial taxa with environmental or plant  
239 functional importance in the rhizosphere differed between the HS and MS samples. The balance  
240 analysis revealed that the log ratios of *Saprospiraceae* and *Solibacteraceae* subgroup3 at the

241 family level and *Rhizobacter* to *Microvirga* at the genus level can effectively differentiate  
242 between the rhizosphere microbiomes of the HS and MS groups. These results corresponded  
243 with differential relative abundance analysis as these taxa of microbial signatures were also  
244 captured by the differential relative abundance analyses. Microbial species under the genus  
245 *Microvirga* include many root symbionts (30), whereas members of the *Rhizobacter* genus are  
246 common rhizobacteria (31) and can also be plant pathogenic (32). Although the relative  
247 abundances were low, these identified taxa served as key signatures to differentiate the HS and  
248 MS rhizosphere bacterial community and may also have functional importance. For example, the  
249 identified family signature *Saprospiraceae* was present at a low level in our study (<1% in  
250 relative abundance), but members of the *Saprospiraceae* family are known to break down  
251 complex organic compounds in the environment (33) and are also suggested to have functional  
252 importance while underrepresented in soil abundance (34). The manner in which these microbial  
253 signatures interacted with the pathogen and host plant and whether they can be used for future  
254 evaluations of dollar spot suppression requires further research.

255 Functional prediction was performed to better understand implications of the differences  
256 identified in microbiome composition and interaction of HS and MS samples in the absence of a  
257 comprehensive metagenomic analysis. The MS rhizosphere microbiome was more enriched in  
258 genetic information processing and cellular processes metabolic pathways, whereas HS  
259 rhizosphere microbiome was more abundant in predicted xenobiotic biodegradation and  
260 metabolism. This result could help explain why the HS rhizosphere microbiome resulted in a  
261 more susceptible turfgrass sample. Many chemical compounds, such as salicylic acid (SA)  
262 analogs and  $\beta$ -Aminobutyric acid, can induce plant systemic acquired resistance that primes  
263 plants to defend against pathogens through activation of SA or abscisic acid (ABA) signaling

264 pathways (35). Higher predicted abundance in gene associated with xenobiotic biodegradation  
265 and metabolism metabolic pathways in the HS rhizosphere microbiome suggested that the  
266 microbiome can more actively degrade xenobiotics such as agrochemicals, transformation  
267 products and secondary metabolites that either have direct antagonistic effects on pathogen  
268 growth, or compounds that have roles in priming plants against pathogens.

269 In the study by Z. Wei et al. (19), structural and functional differences in the rhizosphere  
270 microbiome were found to be the sole factors determining disease severity on tomato. In our  
271 study, bulk soil iron concentration predicted the disease susceptibility as well as that of the  
272 rhizosphere microbiome and seemed to contribute significantly to dollar spot suppression. S. Gu  
273 et al. (36) recently showed that siderophore production as a result of bacterial competition for  
274 iron resources in the soil environment strongly mediates *R. solanacearum* activity in the tomato  
275 rhizosphere. Specifically, iron-scavenging siderophores produced by nonpathogenic members of  
276 the bacterial consortia enhanced the fitness of these nonpathogenic bacteria in the soil  
277 environment and suppressed pathogen growth. Further large-scale screening of all major  
278 bacterial phylogenetic lineages established a strong positive linkage between inhibitory  
279 siderophore production by nonpathogenic bacteria and *R. solanacearum* suppression, indicating  
280 that the relative abundance of bacteria that produce pathogen-unusable siderophores in the  
281 tomato rhizosphere microbiome served as an effective predictor for disease outcome (37). These  
282 studies were done in a soil-borne pathosystem and it is unclear how pathogen-suppressing  
283 siderophore producers in the rhizosphere would compete with *C. jacksonii*, which is a foliar  
284 pathogen and poor soil saprophyte. Other mechanisms are likely involved, such as iron directly  
285 or indirectly neutralizing pathogen activity. For example, G. M. Gadd (38) observed that oxalic  
286 acid, a potential virulence factor of *C. jacksonii*, can react with the free iron in the plant-soil

287 interface and precipitate as crystalline or amorphous solids. Also, in iron-deficient soils, induced  
288 bacterial production of the siderophore pyoverdine repressed the expression of plant defense-  
289 related genes such as the genes involved in SA and ABA pathways which can lead to a higher  
290 plant susceptibility to diseases (39).

291 Low soil iron can also lead to low iron in the plant tissue. Iron plays multifaceted roles in plant  
292 defense mechanisms and plant-pathogen interactions (40). For example, iron serves as a key  
293 factor in plant disease defense via numerous regulatory genes involved in microbe response and  
294 plant homeostasis, including upregulating the transcription of pathogenesis-related genes and  
295 catalyzing the reactive oxygen species when attacked by pathogens (41, 42). Unbalanced iron  
296 homeostasis in plants can have serious impacts on disease outcomes. Low iron in *Arabidopsis*  
297 *thaliana* led to more severe *Dickeya dadantii* infection due to less ferritin coding  
298 transcript AtFER1, callose deposition, and reactive oxygen species production (43). These  
299 collective studies on low soil and plant iron may help explain how lower soil iron in our study  
300 can lead to higher dollar spot susceptibility in turf and vice versa, but direct evidence on how soil  
301 iron interacts with the turfgrass plant to defend against dollar spot requires further analysis.

302 Numerous field and *in vitro* studies have shown the beneficial effect of iron in plant disease  
303 suppression (44-46), and the beneficial effects of iron are often found in conjunction with a  
304 pathogen-suppressive soil microbiome (14, 20). Healthy blueberry (*Vaccinium corymbosum*)  
305 plants were found to associate with more diverse rhizosphere bacterial communities and higher  
306 iron content in the roots compared with unhealthy plants (20). An *in vitro* study demonstrated  
307 that soil Fe-EDDHA amendment has an additive and complementary effect in suppressing  
308 Fusarium wilt (*Fusarium oxysporum* f. sp. *cubense*) disease severity in banana (*Musa spp.*)  
309 grown in a disease suppressive soil (14). The mechanisms of such a complementary effect of iron

310 in our study remain unclear, but the Mantel test results suggest that the rhizosphere microbiome  
311 was likely mediated by interaction between soil iron levels and turfgrass plants, which in turn  
312 impacted disease development.

313 The rhizosphere microbiome is recruited or expelled from the bulk soil through the production of  
314 phytochemicals (47, 48) including many organic acids and secondary metabolites (49). More  
315 specifically, previous work by Y. Pii et al. (50) demonstrated that plant iron status had a  
316 significant impact on the formation of rhizosphere microbiome structures, possibly via the  
317 release of different qualitative and quantitative root exudates. In our study, higher Fe in the bulk  
318 soil of MS samples likely induced production of root exudates that then recruited a particular  
319 rhizosphere microbiome that was more suppressive to dollar spot development. However, this  
320 proposed mechanisms requires significant additional research before it can be used to develop  
321 innovative plant disease control strategies.

322 This study revealed several factors that led to variation in disease development over a small area  
323 in amenity turfgrass. Although further research is required before making firm conclusions, our  
324 findings suggest that antibiotic-producing members in the rhizosphere microbiome likely played  
325 a key role in the dollar spot suppression observed in MS samples. Further, soil iron-plant  
326 interactions were possibly a key regulatory factor in the assembly of a suppressive rhizosphere  
327 microbiome, and this soil-plant-microbe interaction ultimately resulted in the observed variation  
328 in disease development on monocultured turfgrass within a small scale. Future studies on  
329 whether the disease suppressive function can be transplanted into a conducive soil, and how  
330 turfgrass physiologically mediates root exudates to recruit a disease suppressive rhizosphere  
331 microbiome by responding to different levels of soil iron will be critical in further exploring the  
332 hypotheses raised by this research.

333

## 334 MATERIALS AND METHODS

335 **Experimental design, sampling scheme and sample preparation.** The experiment was  
336 conducted on a mature stand of creeping bentgrass (*Agrostis stolonifera* ‘Alpha’) at the O.J Noer  
337 Turfgrass Research Facility in Verona, WI, USA. The turf was grown on a native Troxel silt  
338 loam and mowed three times per week at the height of 1.25 cm. Eighteen turfgrass samples and  
339 the associated soil were taken using a soil sampler with a 13-cm diameter and a 15-cm depth in a  
340 256 m<sup>2</sup> square plot on Oct. 10<sup>th</sup>, 2019. The samples were divided into a top layer (the top 7.5 cm)  
341 and a bottom layer (7.5 to 15 cm depth) by carefully inserting the soil sampler to the specified  
342 depths. Due to the nature of the turfgrass and soil properties, there was hardly any soil without  
343 direct contact with roots in the top layer, and rarely root presence in the bottom layer soil.  
344 Therefore, we defined the bulk soil as the soil from the bottom layer without direct root contact.  
345 The soil samples of each layer were stored separately as turf and bulk soil samples. The turf  
346 samples were then used for inoculation experiments after they were sub-sampled for rhizosphere  
347 microbiome analysis. Bulk soil samples were sub-sampled from the homogenized bottom layer  
348 soil for both microbiome and chemical property analysis. Two, 1-cm diameter subsamples to 5-  
349 cm depth containing approximately 10 to 15 individual creeping bentgrass plants were taken  
350 from each turf sample for microbiome analysis using a custom-made soil probe. The subsamples  
351 from the same turf sample were immediately crushed with a sterile scapula and tweezers, and the  
352 soil loosely attached to the root system was separated from plant and rhizosphere soil by  
353 aggressively shaking in a sterile glass petri dish, rhizosphere soil remained closely attached to  
354 the root was then carefully collected using scapula avoiding the root tissues. The intact turf  
355 samples, which the subsamples were taken from, were then inoculated with one milliliter of



356 dollar spot inoculum using a vaporizer within one hour of sampling. The dollar spot inoculum  
357 was created by growing *C. jacksonii* on potato dextrose broth for 72 hrs, rinsing three times in  
358 distilled water, and homogenizing in sterile 0.85% saline water in a blender for one minute. The  
359 final inoculum had an approximate *C. jacksonii* density of  $4.1 \times 10^4$  CFU/ml, as determined by  
360 testing with triplicated serial dilutions on potato dextrose agar.

361 After inoculation, the turf samples were incubated in a growth chamber at 25°C, 70% relative  
362 humidity, and 15 hr photoperiod. Each sample was placed on a sterile filter paper with an  
363 individual glass water pan. The turf samples were maintained at 0.5 cm height using sterile  
364 scissors, supplied with distilled water through wetting the filter paper, and measured for dollar  
365 spot severity every other day for 16 days (Fig. S1 in the supplemental material). Dollar spot  
366 severity was assessed by taking digital photos 30 cm directly above the turf surface and counting  
367 the percentage of green pixels using imageJ. Bulk soil samples were sent to the Cornell Nutrient  
368 Analysis Laboratory (Ithaca, NY) to analyze the chemical properties including pH, organic  
369 matter content, and Al, Ca, Cu, Fe, K, Mg, Mn, Mo, Na, P, S, Zn, C and N content according to  
370 procedures outline in B. K. Gugino et al. (51). Briefly, soil were dried in open containers  
371 overnight, sieved to remove pebbles and plant tissues, soil organic matter content was measured  
372 by dry combustion at 550°C for two hours, and pH was measured as 1:1 soil to water solution by  
373 volume using an automatic pH probe (Lignin, Albuquerque, NM). Soil nutrients were extracted  
374 using Morgan's solution and quantified with an Inductively Coupled Argon Plasma  
375 Spectrophotometry (Thermo Fisher Scientific, Cambridge, UK).

376 **Library Preparation and short-amplicon sequencing.** For each of the bulk soil and  
377 rhizosphere soil samples, 0.25 g soil was used for DNA extraction using a DNeasy PowerLyzer  
378 PowerSoil kit (Qiagen Inc., Germantown, MD) following the manufacturer's protocol. All

379 extractions were quantified for nucleic acid concentration using a NanoDrop1000 (Thermo  
380 Fischer Scientific, Waltham, MA). The PCR was performed according to K. A. Dill-McFarland  
381 et al. (52) with minor modifications. Briefly, each reaction contained 5  $\mu$ L of the DNA template  
382 at 10 ng/ $\mu$ L, 12.5  $\mu$ L Kapa HiFi HotStart ReadyMix, 6.5  $\mu$ L PCR-grade water, and 0.5  $\mu$ L of  
383 each barcoded forward and reverse primer (53), which targeted the v4 region of the 16S rRNA  
384 gene. The thermocycling conditions were 3 min at 95 °C prior to 25 cycles of 30 s at 95 °C, 30 s  
385 at 55 °C, and 30 s at 72 °C, with a final step of 5 min at 72 °C. The amplicons were purified  
386 using a ZR-96 Zymoclean™ Gel DNA Recovery kit (Zymo Research, Irvine, CA) and  
387 normalized with a Mag-Bind® EquiPure Library Normalization Kit (Omega Bio-Tek Inc,  
388 Norcross, GA). The amplicons were then pooled and quantified to 4 nM with a Qubit™ dsDNA  
389 HS Assay kit (Thermo Fischer Scientific, Waltham, MA). The final pool was sequenced on  
390 Illumina MiSeq with a 2x250bp PE Illumina Reagent Kit v2 (Illumina, Inc., San Diego, CA) in  
391 the Biotechnology Center at the University of Wisconsin-Madison

392 **Data analysis.** The raw sequences were processed using package “DADA2” in R 3.6.0. Forward  
393 and reverse reads were quality filtered according to average quality score and merged. The  
394 taxonomy levels associated with each amplicon sequence variant (ASV) was assigned according  
395 to SILVA database (v.132) after removing the chimeras. The ASV and taxonomic tables were  
396 then exported as .txt files and analyzed using R packages “phyloseq” and “vegan.” The reads for  
397 each sample were normalized using variance stabilizing transformation with the “DeSeq2”  
398 package due to a relatively even reads variation among the samples in the library (54). Microbial  
399 compositional differences and correlations were analyzed using Bray-Curtis dissimilarity.  
400 Shannon diversity of HS and MS were compared using nonparametric Wilcoxon test in JMP Pro  
401 14 (SAS Institute, Cary, NC).

402 Microbial co-occurrence network of HS and MS samples were constructed using Molecular  
403 Ecological Network Analysis (MENA) (55), which uses a Random Matrix Theory (RMT)-based  
404 method to predict the microbial interactions and capture the magnitude of the interactions. The  
405 nodes and the edge lists were then imported into Gephi 0.9.2 (56) for network visualization.  
406 Since the overall ASVs were comprised of approximately 90% of the ASVs having less than  
407 0.02% of overall reads, ASVs that represent less than 0.02% of the total reads after normalization  
408 for each sample were filtered out to make the result more readable. The core community of the  
409 HS and MS microbial networks were compared to quantify the rewiring of the taxa in the  
410 networks by calculating the of neighborhood shift and change of betweenness for the nodes using  
411 NetShift (57). Nodes with the highest degree change among these parameters are considered the  
412 driver taxa. When analyzed at family and genus level, the ASVs were aggregated at each  
413 taxonomy level to create the edge list. Microbial balance analysis was performed using “selbal”  
414 package in R at family and genus level using unnormalized ASV counts, as the compositional  
415 nature of the short-amplicon sequencing result and the uneven sequencing depths were both  
416 accounted in the analysis (58). Differential relative abundances were analyzed using Welch’s t-  
417 test at a significance level of  $\alpha=0.05$  in using Statistical Analysis of Taxonomic and Functional  
418 Profiles (STAMP) (59).

419 Rhizosphere microbiome functional prediction was performed using an R-based tool Tax4Fun2  
420 (21), which used the sequences of the ASV to blast against the SILVA (v.132) reference genome  
421 database to create a metagenome profile. The genetic functions were then assigned by BLASTp  
422 against the KEGG KO (22) as a reference database. Differences in functional pathways at level-  
423 two were statistically analyzed using Welch’s t-test in STAMP. The associations of Bray-Curtis

424 dissimilarity among bulk soil chemical properties, bulk soil microbiome, and rhizosphere  
425 microbiome samples were examined using Mantel test in R.  
426 Soil chemical properties among the disease groups were statistically analyzed with  
427 nonparametric Wilcoxon test in JMP Pro 14 (SAS Institute, Cary, NC) and regression with  
428 average disease severity of peak disease development stage (4-10 DAI) was performed using a  
429 stepwise selection for the optimal predictive model in R. Collinearity variable selection and  
430 removal was performed using a customized function `vif_func` (60) to calculate the variance  
431 inflation factor. The best model was constructed with backward selection using a function  
432 `stepAIC` under package “MASS”.

433 **Data availability.** All the raw sequences generated from this study were deposited at the NCBI  
434 Sequence Read Archive and are publicly accessible under the project number of PRJNA642971.

435

#### 436 ACKNOWLEDGEMENT

437 The authors thank Kurt Hockmeyer and Qiwei Lei for assistance in sampling, Joseph Skrlupka  
438 and Dr. Garret Suen for assistance in preparation for sequencing, and the UW-Madison CALS  
439 Statistical Consulting Lab for providing guidance in statistical analysis.

440

#### 441 REFERENCES

- 442 1. Salgado-Salazar C, Beirn LA, Ismaiel A, Boehm MJ, Carbone I, Putman AI, Tredway LP,  
443 Clarke BB, Crouch JA. 2018. *Clarireedia*: A new fungal genus comprising four

- 444 pathogenic species responsible for dollar spot disease of turfgrass. *Fungal biology*  
445 122:761-773.
- 446 2. Smiley RW, Dernoeden PH, Clarke BB. 2005. *Compendium of turfgrass diseases*, 3rd  
447 edition, vol 1. Am Phytopath Society.
- 448 3. Kerns JP, Tredway LP. 2013. Advances in turfgrass pathology since 1990. *Turfgrass:*  
449 *Biology, Use, and Management* 56:733-776.
- 450 4. Sang H, Hulvey J, Popko Jr JT, Lopes J, Swaminathan A, Chang T, Jung G. 2015. A  
451 pleiotropic drug resistance transporter is involved in reduced sensitivity to multiple  
452 fungicide classes in *Sclerotinia homoeocarpa* (Fr. B. de Toni). *Molecular plant pathology*  
453 16:251-261.
- 454 5. GCI-Staff. 2015. 2015 State of the Industry Report. GIE Media, Inc.
- 455 6. Tomer V, Sangha JK, Ramya H. 2015. Pesticide: An appraisal on human health  
456 implications. *Proceedings of the National Academy of Sciences, India Section B:*  
457 *Biological Sciences* 85:451-463.
- 458 7. Horvath B, Kravchenko A, Robertson G, Vargas Jr J. 2007. Geostatistical analysis of  
459 dollar spot epidemics occurring on a mixed sward of creeping bentgrass and annual  
460 bluegrass. *Crop science* 47:1206-1216.
- 461 8. Adiobo A, Oumar O, Perneel M, Zok S, Höfte M. 2007. Variation of *Pythium*-induced  
462 cocoyam root rot severity in response to soil type. *Soil Biology and Biochemistry*  
463 39:2915-2925.
- 464 9. Mendes R, Kruijt M, De Bruijn I, Dekkers E, van der Voort M, Schneider JH, Piceno YM,  
465 DeSantis TZ, Andersen GL, Bakker PA. 2011. Deciphering the rhizosphere microbiome  
466 for disease-suppressive bacteria. *Science* 332:1097-1100.

- 467 10. Schlatter D, Kinkel L, Thomashow L, Weller D, Paulitz T. 2017. Disease suppressive  
468 soils: new insights from the soil microbiome. *Phytopathology* 107:1284-1297.
- 469 11. Berendsen RL, Pieterse CM, Bakker PA. 2012. The rhizosphere microbiome and plant  
470 health. *Trends in plant science* 17:478-486.
- 471 12. Landa BB, Mavrodi OV, Schroeder KL, Allende-Molar R, Weller DM. 2006. Enrichment  
472 and genotypic diversity of phlD-containing fluorescent *Pseudomonas* spp. in two soils  
473 after a century of wheat and flax monoculture. *FEMS Microbiology Ecology* 55:351-368.
- 474 13. Berg G, Smalla K. 2009. Plant species and soil type cooperatively shape the structure and  
475 function of microbial communities in the rhizosphere. *FEMS Microbiology Ecology*  
476 68:1-13.
- 477 14. Peng H, Sivasithamparam K, Turner D. 1999. Chlamyospore germination and *Fusarium*  
478 wilt of banana plantlets in suppressive and conducive soils are affected by physical and  
479 chemical factors. *Soil Biology and Biochemistry* 31:1363-1374.
- 480 15. Parkin T. 1993. Spatial variability of microbial processes in soil—a review. *Journal of*  
481 *environmental quality* 22:409-417.
- 482 16. Piotrowska A, Długosz J, Namysłowska-Wilczyńska B, Zamorski R. 2011. Field-scale  
483 variability of topsoil dehydrogenase and cellulase activities as affected by variability of  
484 some physico-chemical properties. *Biology and Fertility of Soils* 47:101-109.
- 485 17. Mas MT, Verdú AM. 2018. Soil spatial distribution in a smut fungus-annual grass  
486 interaction: Exploring patterns to understand disease dynamics at plot scale. *Fungal*  
487 *ecology* 33:40-51.

- 488 18. Ritz K, McNicol J, Nunan N, Grayston S, Millard P, Atkinson D, Gollotte A, Habeshaw  
489 D, Boag B, Clegg C. 2004. Spatial structure in soil chemical and microbiological  
490 properties in an upland grassland. *FEMS Microbiology Ecology* 49:191-205.
- 491 19. Wei Z, Gu Y, Friman V-P, Kowalchuk GA, Xu Y, Shen Q, Jousset A. 2019. Initial soil  
492 microbiome composition and functioning predetermine future plant health. *Science*  
493 *advances* 5:eaaw0759.
- 494 20. Chen S, Zhu Y, Shao T, Long X, Gao X, Zhou Z. 2019. Relationship between  
495 rhizosphere soil properties and disease severity in highbush blueberry (*Vaccinium*  
496 *corymbosum*). *Applied Soil Ecology* 137:187-194.
- 497 21. Wemheuer F, Taylor JA, Daniel R, Johnston E, Meinicke P, Thomas T, Wemheuer B.  
498 2020. Tax4Fun2: prediction of habitat-specific functional profiles and functional  
499 redundancy based on 16S rRNA gene sequences. *Environmental Microbiome* 15:1-12.
- 500 22. Kanehisa M, Sato Y, Kawashima M, Furumichi M, Tanabe M. 2016. KEGG as a  
501 reference resource for gene and protein annotation. *Nucleic acids research* 44:D457-D462.
- 502 23. Pantanella F, Berlutti F, Passariello C, Sarli S, Morea C, Schippa S. 2007. Violacein and  
503 biofilm production in *Janthinobacterium lividum*. *Journal of applied microbiology*  
504 102:992-999.
- 505 24. Chiba H, Agematu H, Kaneto R, Terasawa T, Sakai K, Dobashi K, Yoshioka T. 1999.  
506 Rhodopeptins (Mer-N1033), Novel Cyclic Tetrapeptides with Antifungal Activity from  
507 *Rhodococcus* sp. *The Journal of antibiotics* 52:695-699.
- 508 25. Woappi Y, Gabani P, Singh OV. 2013. Emergence of antibiotic-producing  
509 microorganisms in residential versus recreational microenvironments. *British*  
510 *microbiology research journal* 3:280.

- 511 26. Goodfellow M. 2014. Family Nocardiaceae, p 595-650. *In* Rosenberg E, DeLong EF,  
512 Lory S, Stackebrandt E, Thompson F (ed), *The prokaryotes—Actinobacteria*. Springer,  
513 Berlin.
- 514 27. Sen R, Ishak HD, Estrada D, Dowd SE, Hong E, Mueller UG. 2009. Generalized  
515 antifungal activity and 454-screening of *Pseudonocardia* and *Amycolatopsis* bacteria in  
516 nests of fungus-growing ants. *Proceedings of the National Academy of Sciences*  
517 106:17805-17810.
- 518 28. Oskay M. 2009. Antifungal and antibacterial compounds from *Streptomyces* strains.  
519 *African Journal of Biotechnology* 8.
- 520 29. Prapagdee B, Kuekulvong C, Mongkolsuk S. 2008. Antifungal potential of extracellular  
521 metabolites produced by *Streptomyces hygroscopicus* against phytopathogenic fungi.  
522 *International Journal of Biological Sciences* 4:330.
- 523 30. Radl V, Simoes-Araujo JL, Leite J, Passos SR, Martins LMV, Xavier GR, Rumjanek  
524 NGA, Baldani JI, Zilli JE. 2014. *Microvirga vignae* sp. nov., a root nodule symbiotic  
525 bacterium isolated from cowpea grown in semi-arid Brazil. *International Journal of*  
526 *Systematic and Evolutionary Microbiology* 64:725-730.
- 527 31. Wei L, Si M, Long M, Zhu L, Li C, Shen X, Wang Y, Zhao L, Zhang L. 2015.  
528 *Rhizobacter bergeniae* sp. nov., isolated from the root of *Bergenia scopulosa*.  
529 *International journal of systematic and evolutionary microbiology* 65:479-484.
- 530 32. Goto M, Kuwata H. 1988. *Rhizobacter daucus* gen. nov., sp. nov., the causal agent of  
531 carrot bacterial gall. *International Journal of Systematic and Evolutionary Microbiology*  
532 38:233-239.



- 533 33. McIlroy SJ, Nielsen PH. 2014. The family saprospiraceae, p 863-889, Prokaryotes.  
534 Springer Science+ Business Media.
- 535 34. Kaminsky R, Morales SE. 2018. Conditionally rare taxa contribute but do not account for  
536 changes in soil prokaryotic community structure. *Frontiers in microbiology* 9:809.
- 537 35. Conrath U. 2009. Priming of induced plant defense responses. *Advances in botanical  
538 research* 51:361-395.
- 539 36. Gu S, Yang T, Shao Z, Wang T, Cao K, Jousset A, Friman V-P, Mallon C, Mei X, Wei Z.  
540 2020. Siderophore-mediated interactions determine the disease suppressiveness of  
541 microbial consortia. *mSystems* 5.
- 542 37. Gu S, Wei Z, Shao Z, Friman V-P, Cao K, Yang T, Kramer J, Wang X, Li M, Mei X.  
543 2020. Competition for iron drives phytopathogen control by natural rhizosphere  
544 microbiomes. *Nature Microbiology*:1-9.
- 545 38. Gadd GM. 1999. Fungal production of citric and oxalic acid: importance in metal  
546 speciation, physiology and biogeochemical processes, p 47-92, *Advances in microbial  
547 physiology*, vol 41. Elsevier.
- 548 39. Trapet P, Avoscan L, Klinguer A, Pateyron S, Citerne S, Chervin C, Mazurier S,  
549 Lemanceau P, Wendehenne D, Besson-Bard A. 2016. The *Pseudomonas fluorescens*  
550 siderophore pyoverdine weakens *Arabidopsis thaliana* defense in favor of growth in iron-  
551 deficient conditions. *plant physiology* 171:675-693.
- 552 40. Verbon EH, Trapet PL, Stringlis IA, Kruijs S, Bakker PA, Pieterse CM. 2017. Iron and  
553 immunity. *Annual review of phytopathology* 55.
- 554 41. Aznar A, Chen NW, Thomine S, Dellagi A. 2015. Immunity to plant pathogens and iron  
555 homeostasis. *Plant Science* 240:90-97.

- 556 42. Liu G, Greenshields DL, Sammynaiken R, Hirji RN, Selvaraj G, Wei Y. 2007. Targeted  
557 alterations in iron homeostasis underlie plant defense responses. *Journal of Cell Science*  
558 120:596-605.
- 559 43. Kieu NP, Aznar A, Segond D, Rigault M, SIMOND-CÔTE E, Kunz C, SOULIE MC,  
560 Expert D, Dellagi A. 2012. Iron deficiency affects plant defence responses and confers  
561 resistance to *Dickeya dadantii* and *Botrytis cinerea*. *Molecular plant pathology* 13:816-  
562 827.
- 563 44. Barash I, Zion R, Krikun J, Nachmias A. 1988. Effect of iron status on *Verticillium* wilt  
564 disease and on in vitro production of siderophores by *Verticillium dahliae*. *Journal of*  
565 *plant nutrition* 11:893-905.
- 566 45. Ervin E, Zhang X, Goatley J, Askew S. 2004. Trinexapac-ethyl, propiconazole, iron, and  
567 biostimulant effects on shaded creeping bentgrass. *HortTechnology* 14:500-506.
- 568 46. McCall DS, Ervin EH, Shelton CD, Reams N, Askew SD. 2017. Influence of ferrous  
569 sulfate and its elemental components on dollar spot suppression. *Crop Science* 57:581-  
570 586.
- 571 47. Zhang S, Zhu W, Wang B, Tang J, Chen X. 2011. Secondary metabolites from the  
572 invasive *Solidago canadensis* L. accumulation in soil and contribution to inhibition of soil  
573 pathogen *Pythium ultimum*. *Applied Soil Ecology* 48:280-286.
- 574 48. Doornbos RF, van Loon LC, Bakker PA. 2012. Impact of root exudates and plant defense  
575 signaling on bacterial communities in the rhizosphere. A review. *Agronomy for*  
576 *Sustainable Development* 32:227-243.
- 577 49. Kamilova F, Kravchenko LV, Shaposhnikov AI, Azarova T, Makarova N, Lugtenberg B.  
578 2006. Organic acids, sugars, and L-tryptophane in exudates of vegetables growing on

- 579 stonewool and their effects on activities of rhizosphere bacteria. *Molecular Plant-Microbe*  
580 *Interactions* 19:250-256.
- 581 50. Pii Y, Borruso L, Brusetti L, Crecchio C, Cesco S, Mimmo T. 2016. The interaction  
582 between iron nutrition, plant species and soil type shapes the rhizosphere microbiome.  
583 *Plant Physiology and Biochemistry* 99:39-48.
- 584 51. Gugino BK, Abawi GS, Idowu OJ, Schindelbeck RR, Smith LL, Thies JE, Wolfe DW,  
585 Van Es HM. 2009. Cornell soil health assessment training manual. Cornell University  
586 College of Agriculture and Life Sciences.
- 587 52. Dill-McFarland KA, Breaker JD, Suen G. 2017. Microbial succession in the  
588 gastrointestinal tract of dairy cows from 2 weeks to first lactation. *Scientific reports* 7:1-  
589 12.
- 590 53. Kozich JJ, Westcott SL, Baxter NT, Highlander SK, Schloss PD. 2013. Development of a  
591 dual-index sequencing strategy and curation pipeline for analyzing amplicon sequence  
592 data on the MiSeq Illumina sequencing platform. *Appl Environ Microbiol* 79:5112-5120.
- 593 54. Weiss S, Xu ZZ, Peddada S, Amir A, Bittinger K, Gonzalez A, Lozupone C, Zaneveld JR,  
594 Vázquez-Baeza Y, Birmingham A. 2017. Normalization and microbial differential  
595 abundance strategies depend upon data characteristics. *Microbiome* 5:27.
- 596 55. Deng Y, Jiang Y-H, Yang Y, He Z, Luo F, Zhou J. 2012. Molecular ecological network  
597 analyses. *BMC bioinformatics* 13:113.
- 598 56. Bastian M, Heymann S, Jacomy M. 2009. Gephi: an open source software for exploring  
599 and manipulating networks. *ICWSM* 8:361-362.

- 600 57. Kuntal BK, Chandrakar P, Sadhu S, Mande SS. 2019. 'NetShift': A methodology for  
601 understanding 'driver microbes' from healthy and disease microbiome datasets. The  
602 ISME journal 13:442-454.
- 603 58. Rivera-Pinto J, Egozcue J, Pawlowsky-Glahn V, Paredes R, Noguera-Julian M, Calle M.  
604 2018. Balances: a new perspective for microbiome analysis. mSystems 3.
- 605 59. Parks DH, Tyson GW, Hugenholtz P, Beiko RG. 2014. STAMP: statistical analysis of  
606 taxonomic and functional profiles. Bioinformatics 30:3123-3124.
- 607 60. Beck MW. 2017. vif\_fun.r, <https://gist.github.com/fawda123/4717702>. Accessed on  
608 March 10th, 2020.

609

610

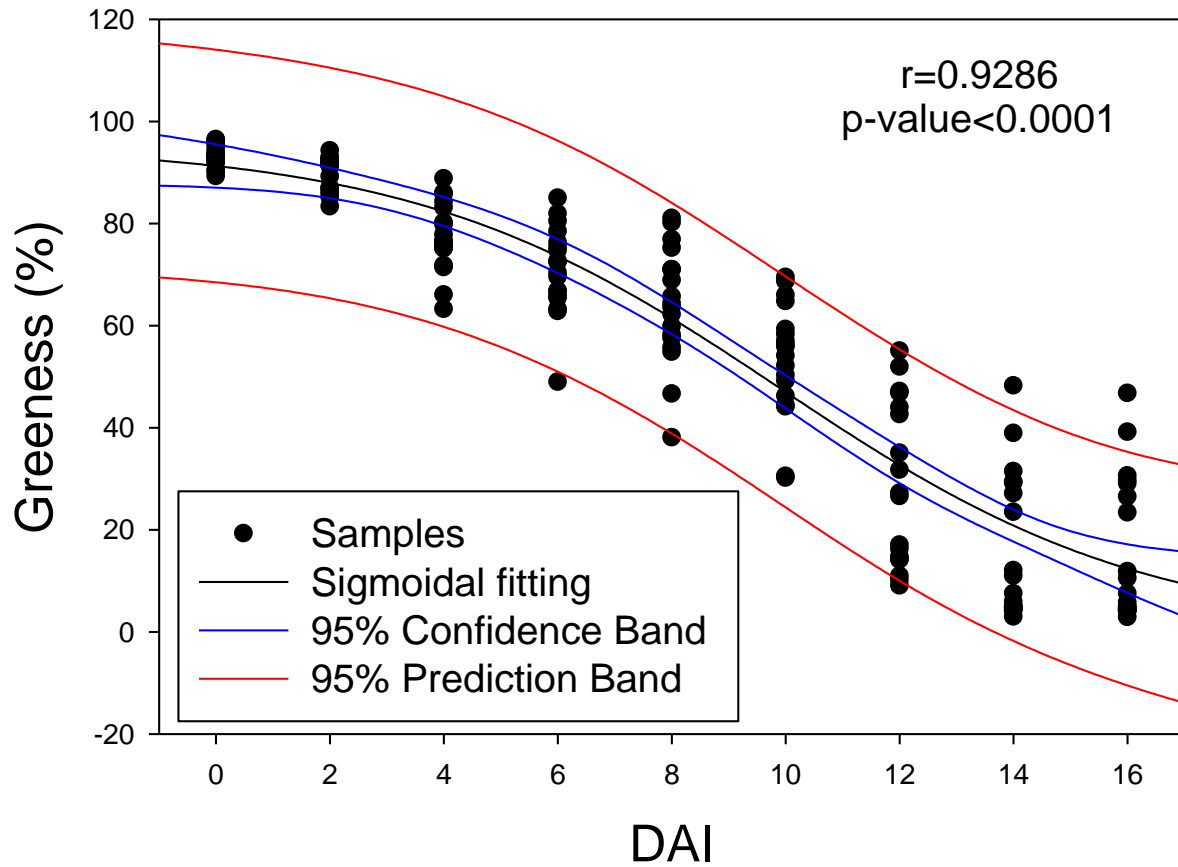

611

612 Figure 1. Dollar spot development as indicated by turf greeness decay curve fitted with  
613 sigmoidal model ( $r=0.9286$ ,  $p<0.0001$ ) throughout 16 days of incubation after dollar spot  
614 inoculation ( $n=18$ ). DAI stands for days after inoculation with *C. jacksonii*.

615

616

617

618

619

620

621

622

623

624

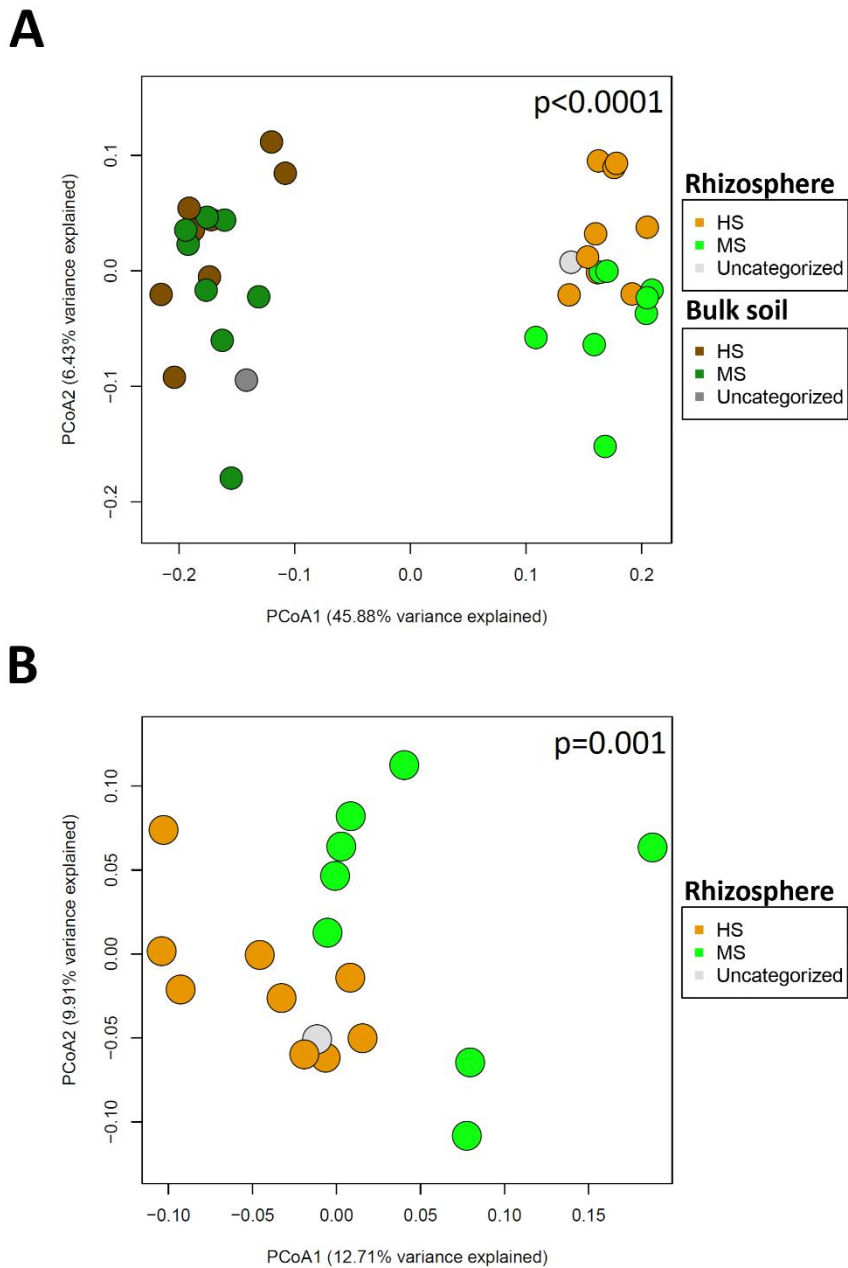

625

626 Figure 2. Principal coordinate analysis (PCoA) of bulk soil versus rhizosphere microbiome (a),

627 and MS versus HS turfgrass rhizosphere microbiome (b). Significant differences between MS

628 and HS samples were tested using PERMANOVA.

629

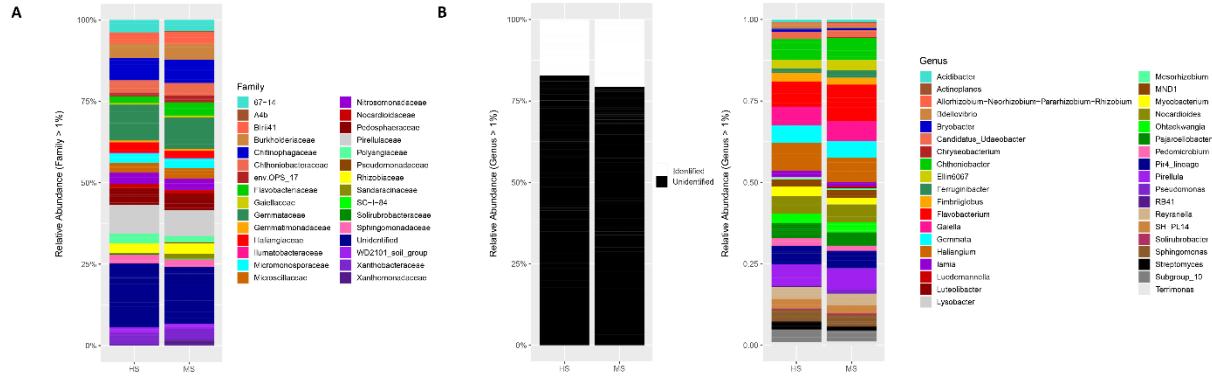

630

631 Figure 3. Relative abundance of rhizosphere microbiome from MS and HS turfgrass at Family (a)  
632 and Genus (b) level.

633

634

635

636

637

638

639

640

641

642

643

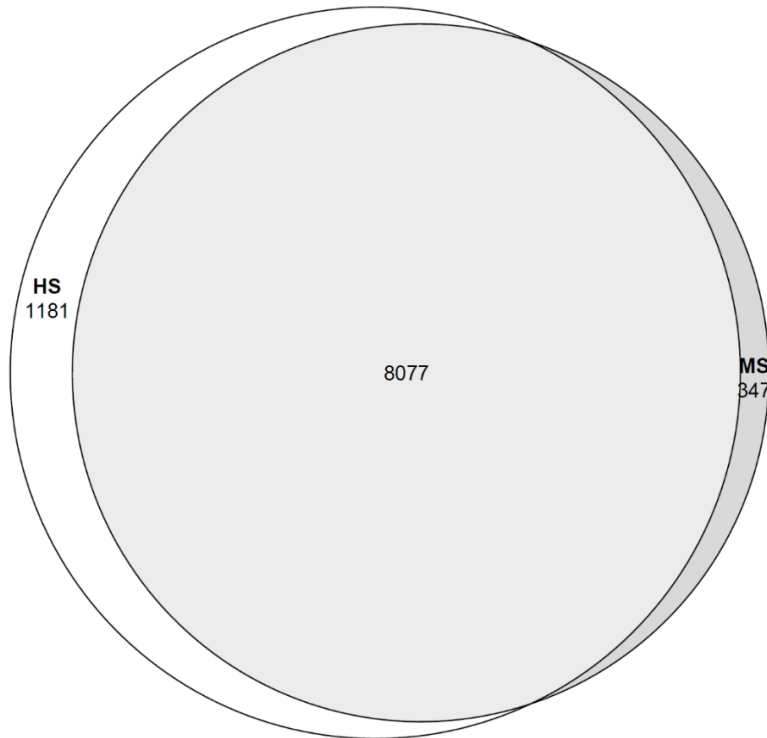

644

645 Figure 4. Proportions of shared and unique ASV between the MS and HS rhizosphere soil  
646 showed as Venn diagram.

647

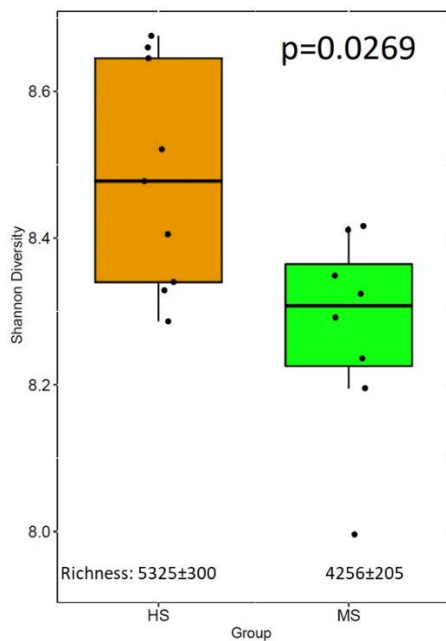

648

649 Figure 5. Bacterial Shannon diversity and richness of rhizosphere microbiome for turfgrass of  
650 MS and HS susceptibility group. The Shannon diversity significant difference was performed  
651 using a nonparametric Wilcoxon test.

652



A

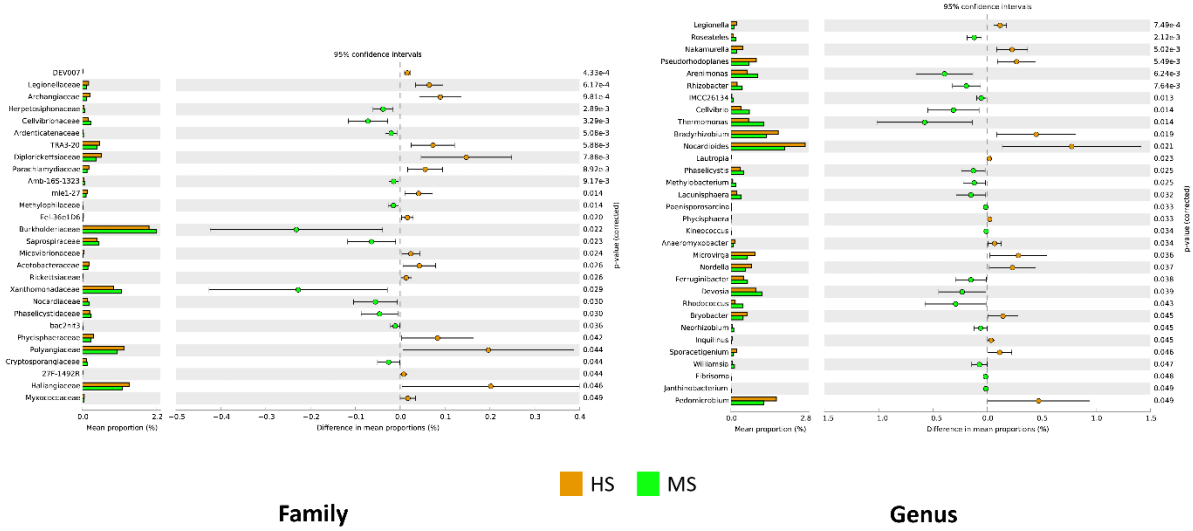

653

B

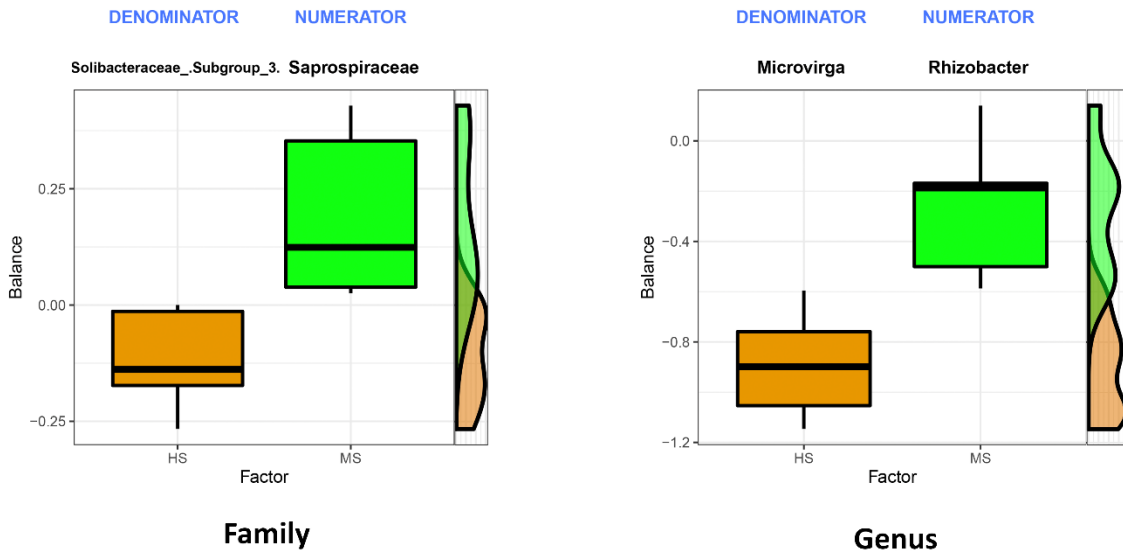

654

655 Figure 6. Rhizosphere microbial taxa relative abundance differences at family and genus level  
 656 tested with Welch's t-test (a). Compositional balance change analysis identifying the microbial  
 657 signatures that discriminate the rhizosphere microbiome between HS and MS (b), the balance  
 658 indicates the logarithm ratio of the relative abundance of identified denominator and numerator.

659

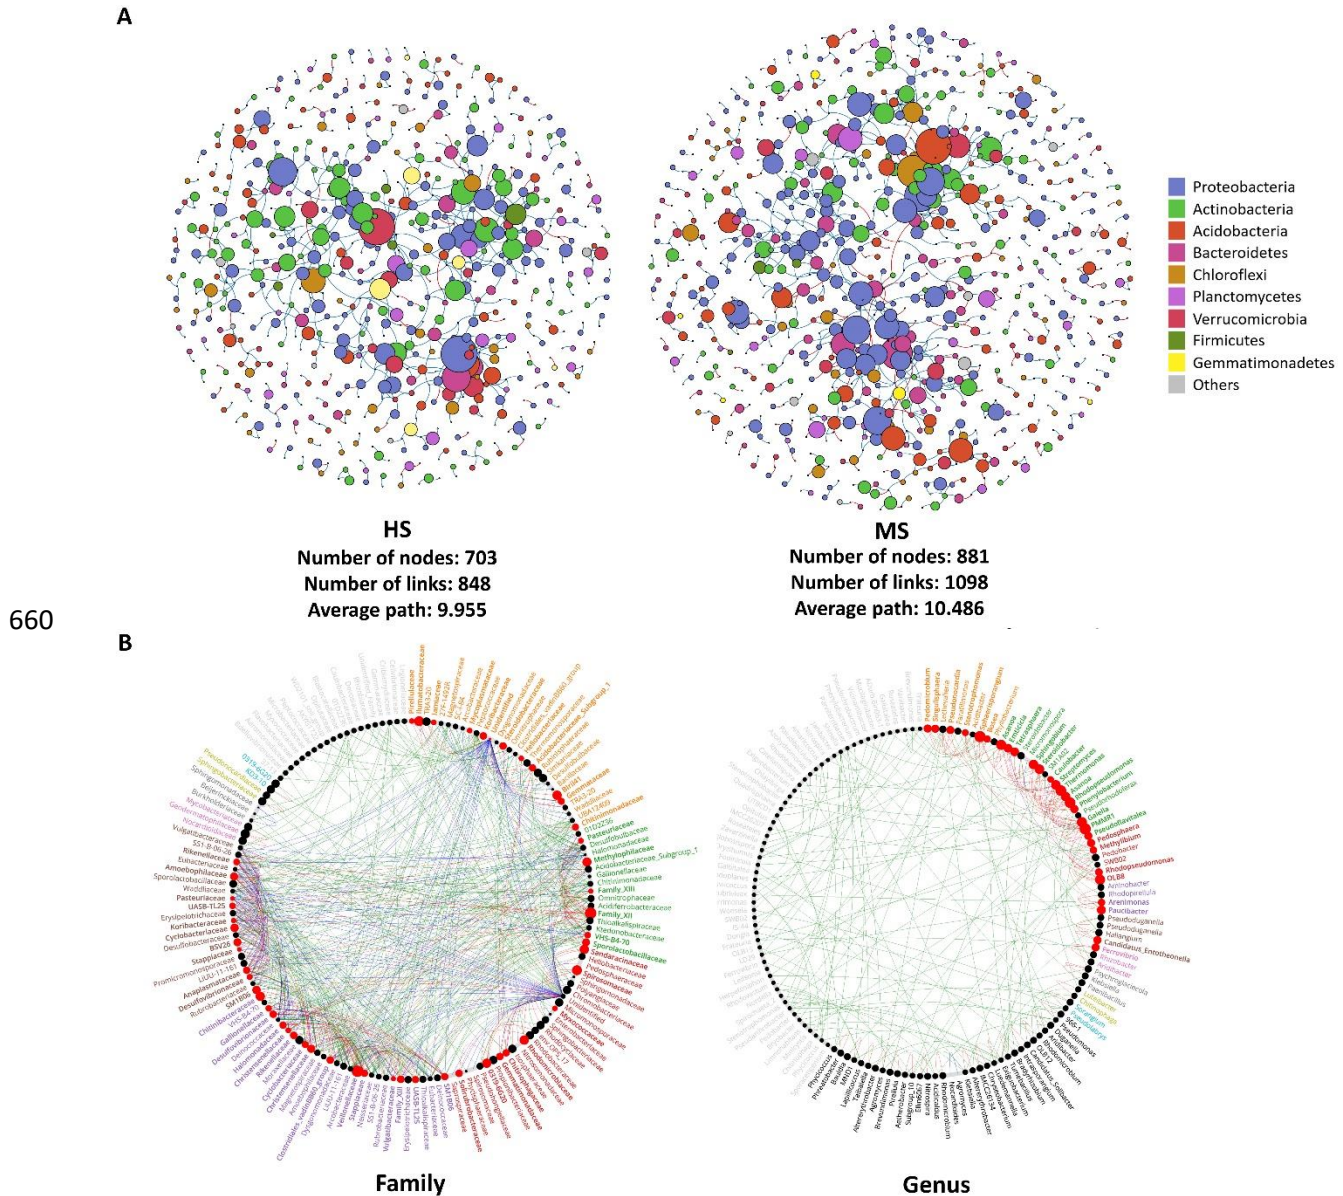

660

661

662 Figure 7. Rhizosphere soil bacterial microbiome co-occurrence networks at phylum level of  
663 dollar spot MS and HS turfgrass (a), in which the size of the nodes were scaled based on in-  
664 degree values, blue and pink paths represents positive and negative correlation, respectively.  
665 NetShift analysis by comparing the co-occurrence networks to identify the driver taxa at family  
666 and genus levels (b), where the nodes were scaled based on the degree in neighbor shift, the red  
667 nodes are the identified important drivers responsible for the network shift between the MS and  
668 HS turfgrass rhizosphere microbiome, and the green, red and blue paths represents the edges  
669 showed in MS, HS and both, respectively.

670

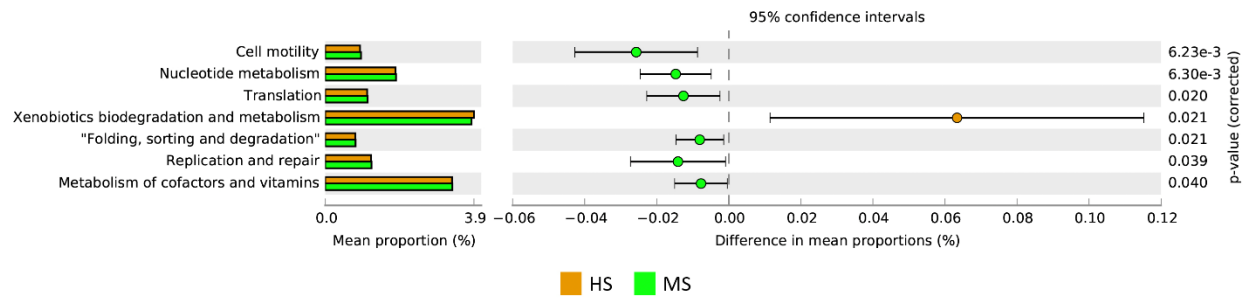

671  
672 Figure 8. Significant differences in predicted rhizosphere microbiome functional pathways of  
673 MS and HS turfgrass using Tax4Fun2 and tested by Welch's t-test.

674

675

676 Table 1. Paired-PERMANOVA analysis of turf-associated soil microbiome prior to *C. jacksonii*  
677 inoculation as categorized based on disease level (high, medium, and low) after inoculation of *C.*  
678 *jacksonii* and throughout the incubation. Asterix indicates the significance level: \* p<0.05 and \*\*  
679 P<0.01. DAI stands for Days after inoculation of *C. jacksonii*.

680

| Pair-comparison | 0 DAI          |         | 2 DAI          |         | 4 DAI          |         | 6 DAI          |         | 8 DAI          |         |        |
|-----------------|----------------|---------|----------------|---------|----------------|---------|----------------|---------|----------------|---------|--------|
|                 | R <sup>2</sup> | P-value | R <sup>2</sup> | P-value | R <sup>2</sup> | P-value | R <sup>2</sup> | P-value | R <sup>2</sup> | P-value |        |
| Rhizosphere     | High vs Low    | 0.116   | 0.126          | 0.124   | 0.090          | 0.138   | 0.006**        | 0.139   | 0.003**        | 0.118   | 0.021* |
|                 | High vs Med    | 0.080   | 1.000          | 0.100   | 0.603          | 0.136   | 0.012*         | 0.112   | 0.090          | 0.103   | 0.345  |
|                 | Low vs Med     | 0.115   | 0.117          | 0.089   | 1.000          | 0.103   | 0.147          | 0.116   | 0.036*         | 0.096   | 0.807  |
| Bulk            | High vs Low    | 0.125   | 0.144          | 0.101   | 0.597          | 0.087   | 1.000          | 0.089   | 1.000          | 0.085   | 1.000  |
|                 | High vs Med    | 0.094   | 0.978          | 0.096   | 0.939          | 0.086   | 1.000          | 0.112   | 0.372          | 0.122   | 0.207  |
|                 | Low vs Med     | 0.093   | 0.984          | 0.087   | 1.000          | 0.076   | 1.000          | 0.088   | 1.000          | 0.099   | 0.549  |
| Pair-comparison | 10 DAI         |         | 12 DAI         |         | 14 DAI         |         | 16 DAI         |         |                |         |        |
|                 | R <sup>2</sup> | P-value | R <sup>2</sup> | P-value | R <sup>2</sup> | P-value | R <sup>2</sup> | P-value |                |         |        |
| Rhizosphere     | High vs Low    | 0.126   | 0.024*         | 0.091   | 1.000          | 0.091   | 1.000          | 0.091   | 1.000          |         |        |
|                 | High vs Med    | 0.128   | 0.036*         | 0.080   | 1.000          | 0.096   | 0.840          | 0.096   | 0.816          |         |        |
|                 | Low vs Med     | 0.109   | 0.096          | 0.092   | 1.000          | 0.100   | 0.540          | 0.100   | 0.573          |         |        |
| Bulk            | High vs Low    | 0.080   | 1.000          | 0.080   | 1.000          | 0.091   | 1.000          | 0.091   | 1.000          |         |        |
|                 | High vs Med    | 0.081   | 1.000          | 0.088   | 1.000          | 0.092   | 1.000          | 0.092   | 1.000          |         |        |
|                 | Low vs Med     | 0.080   | 1.000          | 0.076   | 1.000          | 0.068   | 1.000          | 0.068   | 1.000          |         |        |

681

682 Table 2. Mean separation of turf-associated bulk soil chemical elements as categorized based on disease severity (high, medium, and  
 683 low) after inoculation of *C. jacksonii* and throughout the incubation (a). Iron content (mg/kg of dry soil) of each severity group  
 684 categorized based on the peak of disease development stage (b). Non-parametric Kruskal-Wallis test and Steel-Dwass paired-  
 685 comparison were conducted to test the significance level. Asterix indicates the significance level: \* p<0.05 and \*\* P<0.01. DAI stands  
 686 for Days after inoculation of *C. jacksonii*. Numbers followed by ± indicates standard errors.

687 (A)

|           | DAI 0 |         | DAI 2  |         | DAI 4 |         | DAI 6 |         | DAI 8 |         | DAI 10 |         | DAI 12 |         | DAI 14 |         | DAI 16 |         |
|-----------|-------|---------|--------|---------|-------|---------|-------|---------|-------|---------|--------|---------|--------|---------|--------|---------|--------|---------|
|           | ChiSq | P-value | ChiSq  | P-value | ChiSq | P-value | ChiSq | P-value | ChiSq | P-value | ChiSq  | P-value | ChiSq  | P-value | ChiSq  | P-value | ChiSq  | P-value |
| <b>pH</b> | 0.626 | 0.060   | 4.526  | 0.104   | 3.170 | 0.205   | 1.509 | 0.470   | 1.064 | 0.587   | 2.561  | 0.278   | 2.012  | 0.366   | 2.667  | 0.264   | 2.667  | 0.264   |
| <b>OM</b> | 0.986 | 0.611   | 0.184  | 0.912   | 5.535 | 0.063   | 2.611 | 0.271   | 0.784 | 0.676   | 1.092  | 0.579   | 0.246  | 0.884   | 0.012  | 0.994   | 0.012  | 0.994   |
| <b>Al</b> | 3.942 | 0.139   | 6.398  | 0.041*  | 8.082 | 0.018*  | 5.661 | 0.059   | 4.012 | 0.135   | 9.310  | 0.01**  | 3.310  | 0.191   | 3.193  | 0.203   | 0.319  | 0.203   |
| <b>Ca</b> | 1.977 | 0.372   | 2.854  | 0.240   | 5.719 | 0.057   | 9.310 | 0.01**  | 2.561 | 0.278   | 5.485  | 0.064   | 1.450  | 0.484   | 0.889  | 0.641   | 0.889  | 0.641   |
| <b>Cu</b> | 2.117 | 0.347   | 10.714 | 0.005** | 4.667 | 0.097   | 2.328 | 0.312   | 0.363 | 0.834   | 2.538  | 0.281   | 3.170  | 0.205   | 0.924  | 0.630   | 0.924  | 0.630   |
| <b>Fe</b> | 5.099 | 0.078   | 3.509  | 0.173   | 9.275 | 0.01**  | 7.906 | 0.019*  | 8.924 | 0.012*  | 11.614 | 0.003** | 4.714  | 0.095   | 4.994  | 0.082   | 4.994  | 0.082   |
| <b>K</b>  | 0.363 | 0.834   | 0.152  | 0.927   | 3.521 | 0.172   | 7.029 | 0.030   | 3.193 | 0.203   | 2.047  | 0.359   | 0.328  | 0.849   | 1.263  | 0.532   | 1.263  | 0.532   |
| <b>Mg</b> | 1.063 | 0.587   | 2.538  | 0.281   | 3.661 | 0.160   | 4.678 | 0.096   | 0.854 | 0.653   | 3.170  | 0.205   | 1.275  | 0.529   | 0.667  | 0.717   | 0.667  | 0.717   |
| <b>Mn</b> | 3.029 | 0.220   | 0.877  | 0.645   | 1.205 | 0.548   | 1.509 | 0.470   | 2.632 | 0.268   | 3.895  | 0.143   | 0.503  | 0.778   | 0.246  | 0.884   | 0.246  | 0.884   |
| <b>Mo</b> | 0.456 | 0.796   | 0.222  | 0.895   | 0.714 | 0.700   | 5.556 | 0.062   | 1.556 | 0.459   | 0.714  | 0.700   | 0.105  | 0.949   | 0.737  | 0.692   | 0.737  | 0.692   |
| <b>Na</b> | 1.310 | 0.520   | 0.152  | 0.927   | 4.012 | 0.135   | 3.825 | 0.148   | 0.667 | 0.717   | 3.790  | 0.150   | 0.737  | 0.692   | 0.421  | 0.810   | 0.421  | 0.810   |
| <b>P</b>  | 3.240 | 0.198   | 1.368  | 0.505   | 1.298 | 0.523   | 2.246 | 0.325   | 0.877 | 0.645   | 1.064  | 0.587   | 0.714  | 0.700   | 0.573  | 0.751   | 0.531  | 0.751   |
| <b>S</b>  | 1.556 | 0.459   | 0.105  | 0.949   | 0.140 | 0.932   | 0.433 | 0.805   | 0.561 | 0.755   | 0.035  | 0.983   | 2.117  | 0.347   | 2.117  | 0.347   | 2.117  | 0.347   |
| <b>Zn</b> | 1.298 | 0.523   | 3.415  | 0.181   | 0.012 | 0.994   | 0.246 | 0.884   | 1.509 | 0.470   | 1.064  | 0.587   | 0.246  | 0.884   | 1.275  | 0.529   | 1.275  | 0.529   |
| <b>C</b>  | 1.064 | 0.587   | 3.193  | 0.203   | 0.667 | 0.717   | 0.246 | 0.884   | 1.450 | 0.484   | 0.012  | 0.994   | 3.193  | 0.203   | 2.538  | 0.281   | 2.538  | 0.281   |
| <b>N</b>  | 1.485 | 0.476   | 2.819  | 0.244   | 0.152 | 0.927   | 1.766 | 0.414   | 1.205 | 0.548   | 0.152  | 0.927   | 3.614  | 0.164   | 2.538  | 0.281   | 2.538  | 0.281   |

688 (B)

|           | Group         | DAI 4 |         | DAI 6 |       | DAI 8   |    | DAI 10 |         |    |       |         |    |
|-----------|---------------|-------|---------|-------|-------|---------|----|--------|---------|----|-------|---------|----|
|           |               | Mean  |         | Mean  |       | Mean    |    | Mean   |         |    |       |         |    |
| <b>Fe</b> | <b>High</b>   | 0.825 | ± 0.035 | b     | 0.811 | ± 0.037 | b  | 0.818  | ± 0.035 | b  | 0.795 | ± 0.031 | b  |
|           | <b>Low</b>    | 0.989 | ± 0.035 | a     | 0.975 | ± 0.037 | a  | 0.987  | ± 0.035 | a  | 0.989 | ± 0.031 | a  |
|           | <b>Medium</b> | 0.859 | ± 0.035 | b     | 0.887 | ± 0.037 | ab | 0.868  | ± 0.035 | ab | 0.889 | ± 0.031 | ab |

689 Table 3. Correlations among bulk soil chemical property, bulk soil microbiome and rhizosphere  
690 microbiome using Mantel tests. Asterix indicates the significance level: \*  $p < 0.05$ .

| Correlation                         | Mantel Statistic |         |
|-------------------------------------|------------------|---------|
|                                     | R                | P-value |
| Soil Chem vs Bulk Microbiome        | -0.230           | 0.97    |
| Soil Chem vs Rhizo Microbiome       | 0.245            | 0.048*  |
| Bulk Microbiome vs Rhizo Microbiome | -0.065           | 0.58    |

691 Table 4. Stepwise selection of the optimal regression model for bulk soil chemical elements and  
692 average dollar spot disease severity (greenness) during the peak disease development stage (4-10  
693 DAI). Asterix indicates the significance level: \*\*\* p<0.001.

| <b>Coefficients</b> | <b>Estimate</b> | <b>Std.<br/>Error</b> | <b>t-value</b> | <b>P(&gt; t )</b> |
|---------------------|-----------------|-----------------------|----------------|-------------------|
| <b>Intercept</b>    | 27.09           | 13.06                 | 2.075          | 0.056             |
| <b>Fe</b>           | 69.74           | 16.19                 | 4.309          | <0.001***         |
| <b>Zn</b>           | -27.28          | 15.81                 | 15.81          | 0.105             |

Residual standard error: 6.011 on 15 degrees of freedom

Multiple R-squared: 0.5624,

F-statistic: 9.641 on 2 and 15 DF, p-value: 0.002031

694

695

696

697

698

699 Supplementary Table S1. Wilcoxon non-parametric comparison of soil chemical properties  
700 between HS and MS associated bulk soil.

| Property | Level | Mean     | Std. Dev. | Std. Error Mean | Lower 95% | Upper 95% | Wilcoxon p-value |
|----------|-------|----------|-----------|-----------------|-----------|-----------|------------------|
| pH       | HS    | 7.240778 | 0.233394  | 0.0777981       | 7.061375  | 7.420181  | 0.0543           |
|          | MS    | 7.398875 | 0.07535   | 0.0266401       | 7.335881  | 7.461869  |                  |
| OM       | HS    | 2.985949 | 0.275381  | 0.0917936       | 2.774273  | 3.197625  | 0.7361           |
|          | MS    | 3.076462 | 0.103921  | 0.0367415       | 2.989582  | 3.163342  |                  |
| Al       | HS    | 2.774205 | 0.252402  | 0.0841339       | 2.580192  | 2.968218  | 0.0161*          |
|          | MS    | 3.162284 | 0.29524   | 0.104383        | 2.915458  | 3.409111  |                  |
| Ca       | HS    | 1639.915 | 80.10273  | 26.700911       | 1578.342  | 1701.487  | 0.0433*          |
|          | MS    | 1714.069 | 110.1071  | 38.928753       | 1622.017  | 1806.121  |                  |
| Cu       | HS    | 0.080371 | 0.032808  | 0.0109359       | 0.055153  | 0.105589  | 0.2482           |
|          | MS    | 0.092079 | 0.020072  | 0.0070966       | 0.075298  | 0.10886   |                  |
| Fe       | HS    | 0.818683 | 0.097546  | 0.0325154       | 0.743702  | 0.893664  | 0.0021**         |
|          | MS    | 0.975093 | 0.055358  | 0.0195718       | 0.928813  | 1.021373  |                  |
| K        | HS    | 155.3454 | 11.78698  | 3.9289926       | 146.2852  | 164.4057  | 0.1489           |
|          | MS    | 161.5223 | 8.360104  | 2.955743        | 154.5331  | 168.5115  |                  |
| Mg       | HS    | 493.3613 | 26.29071  | 8.7635684       | 473.1525  | 513.5702  | 0.2898           |
|          | MS    | 507.6362 | 38.32882  | 13.551285       | 475.5925  | 539.6799  |                  |
| Mn       | HS    | 2.186369 | 1.367373  | 0.4557909       | 1.135313  | 3.237424  | 0.0833           |
|          | MS    | 3.398221 | 1.248337  | 0.4413539       | 2.354585  | 4.441857  |                  |
| Mo       | HS    | 0.005837 | 0.001988  | 0.0006626       | 0.004309  | 0.007364  | 0.9233           |
|          | MS    | 0.005627 | 0.001894  | 0.0006696       | 0.004044  | 0.00721   |                  |
| Na       | HS    | 27.50916 | 2.103361  | 0.7011202       | 25.89237  | 29.12594  | 0.5006           |
|          | MS    | 28.36482 | 1.818714  | 0.6430124       | 26.84434  | 29.8853   |                  |
| P        | HS    | 16.69933 | 1.557548  | 0.5191827       | 15.50209  | 17.89657  | 0.4414           |
|          | MS    | 15.66392 | 2.09468   | 0.7405812       | 13.91272  | 17.41511  |                  |
| S        | HS    | 4.721017 | 0.446798  | 0.1489327       | 4.377577  | 5.064456  | 0.5006           |
|          | MS    | 4.889829 | 0.443375  | 0.1567568       | 4.519157  | 5.2605    |                  |
| Zn       | HS    | 0.825432 | 0.158275  | 0.0527584       | 0.703771  | 0.947093  | 0.8474           |
|          | MS    | 0.849113 | 0.034658  | 0.0122533       | 0.820139  | 0.878088  |                  |
| C        | HS    | 1.798    | 0.085772  | 0.0285905       | 1.73207   | 1.86393   | 0.9233           |
|          | MS    | 1.843875 | 0.214384  | 0.0757961       | 1.664646  | 2.023104  |                  |
| N        | HS    | 0.170222 | 0.011998  | 0.0039992       | 0.161     | 0.179445  | 0.8474           |
|          | MS    | 0.176125 | 0.021649  | 0.0076542       | 0.158026  | 0.194224  |                  |

701

702

703

704

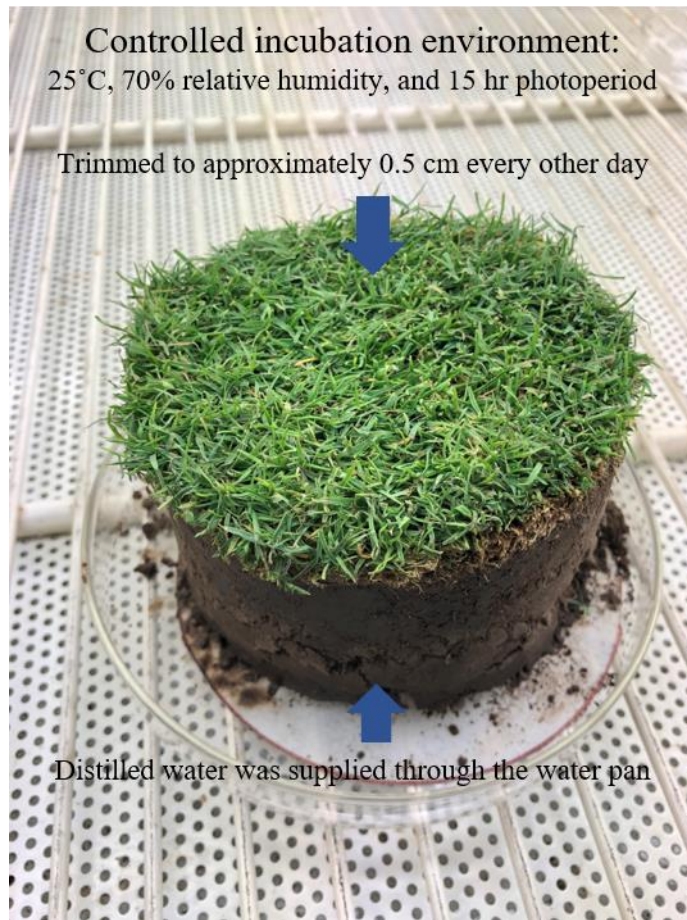

705

706 Supplementary Figure S1. Set-up of each turf sample in the controlled environment growth  
707 chamber for the incubation after inoculation with *C. jacksonii*.

708

709
